# Supplementary material for: Thermopower enhancement by encapsulating cerium in clathrate cages
Source: Springer Nature journal article supplement (doi:10.1038/nmat3756), 2013-09-20
Supplement: 41563_2013_BFnmat3756_MOESM4_ESM.pdf [file 41563_2013_BFnmat3756_MOESM4_ESM.pdf]

## Thermopower enhancement by encapsulating cerium in clathrate cages

A. Prokofiev<sup>1\*</sup>, A. Sidorenko<sup>1</sup>, K. Hradil<sup>2</sup>, M. Ikeda<sup>1</sup>, R. Svagera<sup>1</sup>, M. Waas<sup>1</sup>, H. Winkler<sup>1</sup>,  
K. Neumaier<sup>3</sup>, and S. Paschen<sup>1\*\*</sup>

<sup>1</sup>Institute of Solid State Physics, Vienna University of Technology,  
Wiedner Hauptstr. 8-10, 1040 Vienna, Austria

<sup>2</sup>X-Ray Center, Vienna University of Technology,  
Getreidemarkt 9, 1060 Vienna, Austria

<sup>3</sup>Walther-Meißner-Institute for Low Temperature Research,  
Walther-Meißner-Str. 8, 85748 Garching, Germany

\* e-mail: prokofiev@ifp.tuwien.ac.at

\*\* e-mail: paschen@ifp.tuwien.ac.at

### I. SINGLE CRYSTAL X-RAY DIFFRACTION

#### A. Experimental details

Single crystal data collection was performed on a Bruker APEX2 four-circle diffractometer in Kappa geometry using a CCD detector for the sample Ce-BAS and on a Stoe StadiVari four-circle diffractometer with an open Eulerian cradle in combination with a Dectris PILATUS 300K pixel detector for the sample La-BAS. For both samples complete reciprocal spheres with high redundancy were measured using laboratory X-ray sources. The data set for Ce-BAS was corrected for absorption using a semi-empirical absorption correction by applying the multi-scan approach of SADABS<sup>1</sup>. A numerical absorption correction was applied using the program HABITUS<sup>2</sup> for the La-BAS data set. Extinction correction was applied based on the B\_C type 1 Gaussian model<sup>3</sup> within the refinement program JANA2006<sup>4</sup>. Further details of the data collection and refinements are summarized in Table I - V.

Different models for the partial replacement of Ba with Ce on the  $2a$  and  $6d$  crystallographic site, within the small and large cage, respectively, were refined using the program JANA2006<sup>4</sup>. Due to the close X-ray contrast from Ba and Ce (La) we fixed the Ba to Ce (La) ratio to the value determined by EXD. The model for the partial Ba replacement by Ce on the  $2a$  site resulted in the residuals  $R = 1.90\%$  and  $R = 2.61\%$ , the model with Ce

on the  $6d$  site yields  $R = 1.99\%$  and  $R = 3.1\%$  for Ce-BAS and La-BAS, respectively. The Fourier maps for refinement cycles with 6 Au atoms on the  $6c$  site resulted in a negative electron density on the  $6c$  site and a positive one on the  $24k$  site of Si. The redistribution of some Au atoms on the  $24k$  site with a concomitant distribution of Si on the  $6c$  site give a significant residual reduction to  $R = 1.74\%$  for Ce-BAS and  $R = 2.18\%$  La-BAS.

## B. Results

Our single crystal X-ray refinements yield the lattice parameters  $a = 10.3950(1) \text{ \AA}$  and  $a = 10.3954(4) \text{ \AA}$  for Ce-BAS and La-BAS, respectively. These are sizeably smaller than published values for  $\text{Ba}_8\text{Au}_x\text{Si}_{46-x}$  (BAS) clathrates with similar Au content<sup>5-7,11</sup>. The structural features of the framework of our clathrates are similar to those of BAS. The  $6c$  position is shared by Au and Si although a small portion of Au (2%) occupies the  $24k$  site of Si, a feature which was also found in BAS<sup>5,7</sup>. No appreciable improvement of the refinement was obtained by introducing vacancies. Because of the very similar atomic form factors of Ba and Ce (La) for X-ray scattering, no partition in  $2a$  and  $6d$  sites could be found. Nevertheless, a specific location of Ce (La) can be uncovered indirectly. The introduction of smaller Ce and La atoms results not only in a unit cell reduction but also in local lattice distortions. At the general unit cell contraction by about 0.2% the radius of the smaller cage reduces by 0.81% in Ce-BAS and by 0.89% in La-BAS, whereas that of the larger cage remains essentially unchanged. This fact is strong evidence of a preferential location of Ce (La) in the smaller cages. This is consistent with the occupation of the smaller cages in mixed Ba-Eu clathrates by Eu, which could be obtained directly from X-ray refinements<sup>8,9</sup> since the difference in the Ba and Eu atomic form factors is essential.

The high quality of our refinements attested by the low  $R$  values resulted in substantially smaller atomic displacement parameters (ADPs) in comparison with earlier investigations<sup>7,10</sup>. For  $u_{22}$  on  $6d$  (Ba in large cage) and  $u_{22}$  on  $6c$  (Au/Si in large cage), however, this reduction is smaller than the average value, both in Ce-BAS and La-BAS. This may be a sign of enhanced rattling of Ba in the large cages. An even more important issue, however, is to analyze the ADPs in the small cages where Ce (La) are situated. For Ce-BAS,  $u_{11}$  on  $2a$  (Ce/Ba in small cage) is likewise reduced by less than the average value. For La-BAS, however,  $u_{11}$  on  $2a$  (La/Ba in small cage) is reduced by the average value.

However, even this maintenance of  $u_{11}$  on  $2a$  after the substantial (unproportional) cage shrinkage indicates an effectively enhanced rattling. Moreover,  $2a$  is shared by Ce (La) and Ba, and  $u_{11}$  is merely an average value. The shrinking of the small cages results inevitably in the reduction of the rattling amplitude of Ba and hence an enhancement of the rattling amplitude of Ce (La).

### C. Calculation of the mean cage radius

We calculated the cage radii of the two clathrate cages by

$$R_{\text{cage}} = \frac{\sum_{i=1}^N R_i}{N} \quad (1)$$

where  $N$  is the number of cage atoms (20 for the small cage, 24 for the large cage) and  $R_i$  are distances from the  $i$ -th cage atom to the cage center.

- 
1. Bruker, *APEX2*, *SAINTE* and *SADABS*, Bruker AXS Inc., Madison, USA (1987).
  2. Herrendorf, W. *HABITUS*, University of Giessen, Germany (1997).
  3. Becker, P. J. & Coppens, P. Extinction within the limit of validity of the Darwin transfer equations. I. General formalism for primary and secondary extinction and their application to spherical crystals. *Acta Cryst. A* **30**, 129–147 (1974).
  4. Petříček, V., Dušek, M. & Palatinus, L. *JANA2006*, Institute of Physics, Praha, Czech Republic.
  5. Zeiringer, I. *et al.* The ternary system Au-Ba-Si: Clathrate solution, electronic structure, physical properties, phase equilibria and crystal structures. *Acta Materialia* **60**, 2324–2336 (2012).
  6. Herrmann, R. F. W. *et al.* Electronic structure of Si and Ge gold-doped clathrates. *Phys. Rev. B* **60**, 13245–13248 (1999).
  7. Jaussaud, N. *et al.*  $n$ - and  $p$ -type behavior of the gold-substituted type-I clathrate,  $\text{Ba}_8\text{Au}_x\text{Si}_{46-x}$  ( $x = 5.4$  and  $5.9$ ). *C. R. Chim.* **8**, 39–46 (2005).
  8. Demchyna, R. *et al.* High-pressure synthesis and physical properties of the europium-substituted barium clathrate  $\text{Ba}_{8-x}\text{Eu}_x\text{Ge}_{43}\square_3$  ( $x \leq 0.6$ ). *Z. Anorg. Allg. Chem.* **632**, 73–78 (2006).

9. Mudryk, Y. *et al.* Thermoelectricity of clathrate I Si and Ge phases. *J. Phys.: Condens. Matter* **14**, 7991–8004 (2002).
10. Cordier, G. & Woll, P. Neue ternäre Verbindungen mit Clathratstruktur:  $\text{Ba}_8(T,\text{Si})_6\text{Si}_{40}$  und  $\text{Ba}_8(T,\text{Ge})_6\text{Ge}_{40}$  mit  $T = \text{Ni, Pd, Pt, Cu, Ag, Au}$ . *J. Less Common Met.* **169**, 291–302 (1991).
11. Aydemir, U. *et al.* Low-temperature thermoelectric, galvanomagnetic, and thermodynamic properties of the type-I clathrate  $\text{Ba}_8\text{Au}_x\text{Si}_{46-x}$ . *Phys. Rev. B* **84**, 195137 (2011).
12. ICDD, PDF-4 2013, Int. Centre for Diffraction Data, Newtown Square, PA, USA (2013).

TABLE I: Crystal data.

| Crystal data                                   | Ce-BAS                                                                      | La-BAS                                                                       |
|------------------------------------------------|-----------------------------------------------------------------------------|------------------------------------------------------------------------------|
| Refined chemical formula <sup>1</sup>          | Ba <sub>6.91</sub> Ce <sub>1.06</sub> Au <sub>5.75</sub> Si <sub>40.2</sub> | Ba <sub>6.99</sub> La <sub>1.23</sub> Au <sub>5.92</sub> Si <sub>39.01</sub> |
| Formula weight (g mol <sup>-1</sup> )          | 3389.77                                                                     | 3422.2                                                                       |
| Crystal system                                 | cubic                                                                       | cubic                                                                        |
| Space group                                    | <i>Pm</i> $\bar{3}$ <i>n</i>                                                | <i>Pm</i> $\bar{3}$ <i>n</i>                                                 |
| Unit cell dimensions (Å)                       | 10.3950(1)                                                                  | 10.3954(4)                                                                   |
| Unit cell volume (Å <sup>3</sup> )             | 1123.24(3)                                                                  | 1123.37(6)                                                                   |
| <i>Z</i>                                       | 1                                                                           | 1                                                                            |
| Calculated density $D_x$ (g cm <sup>-3</sup> ) | 4.9373                                                                      | 5.0118                                                                       |
| Absorption coefficient (mm <sup>-1</sup> )     | 26.168                                                                      | 27.238                                                                       |
| Crystal shape                                  | irregular                                                                   | irregular                                                                    |
| Crystal dimensions ( $\mu$ m)                  | 60 $\times$ 20 $\times$ 10                                                  | 40 $\times$ 40 $\times$ 5                                                    |

<sup>1</sup>Ba, Ce (La) content fixed to EDX results

TABLE II: Data collection.

| Data collection                                | Ce-BAS           | La-BAS               |
|------------------------------------------------|------------------|----------------------|
| Diffractometer                                 | Bruker D8/APEXII | STOE StadiVari       |
| Detector                                       | CCD              | Dectris Pilatus 300k |
| Data collection method                         | $\phi$ scans     | $\phi$ scans         |
| Temperature (K)                                | 295              | 295                  |
| Radiation (Å)                                  | Mo K $\alpha$    | Mo K $\alpha$        |
| $\theta_{\max}$ (°)                            | 50.12            | 39.94                |
| No. collected reflections ( $I > 3\sigma(I)$ ) | 38782            | 8137                 |
| No. independent reflections                    | 1097             | 612                  |
| No. observed reflections                       | 975              | 432                  |
| $R_{(\text{int})}$ (%)                         | 6.43             | 7.20                 |

TABLE III: Refinement.

| Data collection                            | Ce-BAS                                                          | La-BAS                                                          |
|--------------------------------------------|-----------------------------------------------------------------|-----------------------------------------------------------------|
| Absorption correction                      | Multi-scan <i>SADABS</i> <sup>1</sup>                           | Numerical <i>HABITUS</i> <sup>2</sup>                           |
| Extinction correction                      | B-C type 1 Gaussian isotrop <sup>3</sup>                        | B-C type 1 Gaussian isotrop <sup>3</sup>                        |
| No. refined parameters                     | 19                                                              | 19                                                              |
| Weighting scheme                           | based on measured s.u.s,<br>$w = 1[\sigma^2(F) + 0.0001 (F^2)]$ | based on measured s.u.s,<br>$w = 1[\sigma^2(F) + 0.0001 (F^2)]$ |
| $R[F > 3\sigma(F^2)]$ (%)                  | 1.74                                                            | 2.18                                                            |
| $wR(F^2)$ (%)                              | 2.31                                                            | 2.61                                                            |
| $S$                                        | 1.64                                                            | 1.38                                                            |
| $\Delta\sigma_{\max}$ (e Å <sup>-3</sup> ) | 1.91                                                            | 2.62                                                            |
| $\Delta\sigma_{\min}$ (e Å <sup>-3</sup> ) | -2.1                                                            | -1.22                                                           |

TABLE IV: Site occupancies, atomic coordinates and displacement parameters ( $\text{\AA}^2$ ).

|                                                                | Ce-BAS       | La-BAS       |
|----------------------------------------------------------------|--------------|--------------|
| Wyckoff site (2a): $(0, 0, 0)^1$ ; $(2 - m)$ Ba; $(m)$ Ce (La) |              |              |
| $m$                                                            | 0.132        | 0.149        |
| $u_{\text{iso};\text{Ba,Ce(La)}}$                              | 0.00677(4)   | 0.00426(9)   |
| $u_{11;\text{Ba,Ce(La)}}$                                      | 0.00678(11)  | 0.00426(29)  |
| Wyckoff site (6d): $(0.25, 0.5, 0)^2$ ; (6) Ba                 |              |              |
| $u_{\text{iso},\text{Ba}}$                                     | 0.01606(7)   | 0.01281(20)  |
| $u_{11,\text{Ba}}$                                             | 0.01038(16)  | 0.00745(59)  |
| $u_{22,\text{Ba}}$                                             | 0.01890(14)  | 0.01548(42)  |
| Wyckoff site (6c): $(0.25, 0, 0.5)^2$ ; (6) Au                 |              |              |
| $u_{\text{iso};\text{Au,Si}}$                                  | 0.00648(3)   | 0.00484(13)  |
| $u_{11;\text{Au,Si}}$                                          | 0.00677(8)   | 0.00428(20)  |
| $u_{22;\text{Au,Si}}$                                          | 0.00660(6)   | 0.00479(33)  |
| Wyckoff site (16i): $(x, x, x)^3$ ; (16) Si                    |              |              |
| $x$                                                            | 0.1832(1)    | 0.1830(1)    |
| $u_{\text{iso},\text{Si}}$                                     | 0.00559(8)   | 0.00436(23)  |
| $u_{11,\text{Si}}$                                             | 0.00562(26)  | 0.00436(69)  |
| $u_{23,\text{Si}}$                                             | -0.00058(8)  | -0.00051(50) |
| Wyckoff site (24k): $(0, y, z)^4$ ; $(24 - 0)$ Si; (0) Au      |              |              |
| 0                                                              | 0.418(3)     | 0.312(1)     |
| $y$                                                            | 0.3041(1)    | 0.3037(2)    |
| $z$                                                            | 0.1174(1)    | 0.1170(2)    |
| $u_{\text{iso};\text{Si,Au}}$                                  | 0.00667(6)   | 0.00479(68)  |
| $u_{11;\text{Si,Au}}$                                          | 0.00677(33)  | 0.00428(90)  |
| $u_{22;\text{Si,Au}}$                                          | 0.00660(33)  | 0.00479(88)  |
| $u_{33;\text{Si,Au}}$                                          | 0.00642(32)  | 0.00531(95)  |
| $u_{23;\text{Si,Au}}$                                          | -0.00012(21) | -0.00011(88) |

$$^1u_{11} = u_{22} = u_{33}; u_{23} = u_{13} = u_{12} = 0; ^2u_{22} = u_{33}; u_{23} = u_{13} = u_{12} = 0$$

$$^3u_{22} = u_{33}; u_{23} = u_{13} = u_{12}; ^4u_{13} = u_{12} = 0$$

TABLE V: Selected interatomic distances (Å).

|                                                                                                                                     | Ce- BAS   | La- BAS    |
|-------------------------------------------------------------------------------------------------------------------------------------|-----------|------------|
| $\text{Au}_{6c} - \text{Ba}_{6d}^{(i),(ii),(iii)}$                                                                                  | 3.6752(3) | 3.6753(2)  |
| $\text{Au}_{6c} - \text{Si}, \text{Au}_{24k}^{(iv),(v),(vi)}$                                                                       | 2.4607(8) | 2.4650(2)  |
| $\text{Ba}, \text{La}(\text{Ce})_{2a} - \text{Si}, \text{Au}_{24k}^{(ii),(vii),(viii),(ix),(x),(xi),(xii),(xiii),(xiv),(xv),(xvi)}$ | 3.3870(8) | 3.3830(2)  |
| $\text{Ba}_{2a} - \text{Si}_{16i}^{(vii),(viii),(ix),(xvii),(xviii),(xix),(xx)}$                                                    | 3.2993(6) | 3.2956(15) |
| $\text{Ba}_{6d} - \text{Si}_{24k}^{(vi),(v),(x),(xviii),(xxi)}$                                                                     | 3.5201(5) | 3.5210(17) |
| $\text{Si}_{16i} - \text{Si}_{16i}^{(xxi)}$                                                                                         | 2.4037(9) | 2.411(2)   |
| $\text{Si}_{16i} - \text{Si}, \text{Au}_{24k}^{(ii),(x)}$                                                                           | 2.3820(8) | 2.380(2)   |
| $\text{Si}, \text{Au}_{24k} - \text{Si}, \text{Au}_{24k}^{(ix)}$                                                                    | 2.4382(1) | 2.433(4)   |

Symmetry codes:

- $(i) - x + 1, -y + 1, z; (ii) y, z, x;$
- $(iii) - y + 1, z, -x; (iv) - x + 1, y, -z;$
- $(v) z + 1/2, -y + 1/2, x - 1/2; (vi) - z + 1/2, -y + 1/2, -x + 1/2;$
- $(vii) - x, -y, z; (viii) - x, y, -z;$
- $(ix) x, -y, -z; (x) z, x, y;$
- $(xi) z, -x, -y; (xii) - z, -x, y;$
- $(xiii) - z, x, -y; (xiv) - y, z, -x;$
- $(xv) y, -z, -x; (xvi) - y, -z, x;$
- $(xvii) - x, -y, -z; (xviii) x, y, -z;$
- $(xix) x, -y, z; (xx) - x, y, z; (xxi) z, -x + 1, -y$
